# Supplementary material for: Identification of IFN-γ-producing innate B cells
Source: PubMed Central journal article supplement — Cell Res. 2013 Dec 3;24(2):161–76. doi: 10.1038/cr.2013.155 (PMC3915900; doi:10.1038/cr.2013.155), 2013-12-03
Supplement: cr2013155x1.pdf [file cr2013155x1.pdf]

**Supplementary information, Figure S1** CD40 ligation plus IL-1 $\beta$  are not sufficient to convert FO B cells to CD11a<sup>hi</sup> Fc $\gamma$ RIII<sup>hi</sup> B cells *in vitro*. Splenic FO B cells from WT mice were purified, and cultured alone or in the presence of agonistic anti-CD40 mAbs and recombinant IL-1 $\beta$ . The percentages of CD11a<sup>hi</sup>Fc $\gamma$ RIII<sup>hi</sup> cells in CD19<sup>+</sup> B cells were then assessed after 48h.
