# Supplementary material for: Identification of IFN-γ-producing innate B cells
Source: PubMed Central journal article supplement — Cell Res. 2013 Dec 3;24(2):161–76. doi: 10.1038/cr.2013.155 (PMC3915900; doi:10.1038/cr.2013.155), 2013-12-03
Supplement: cr2013155x2.pdf [file cr2013155x2.pdf]

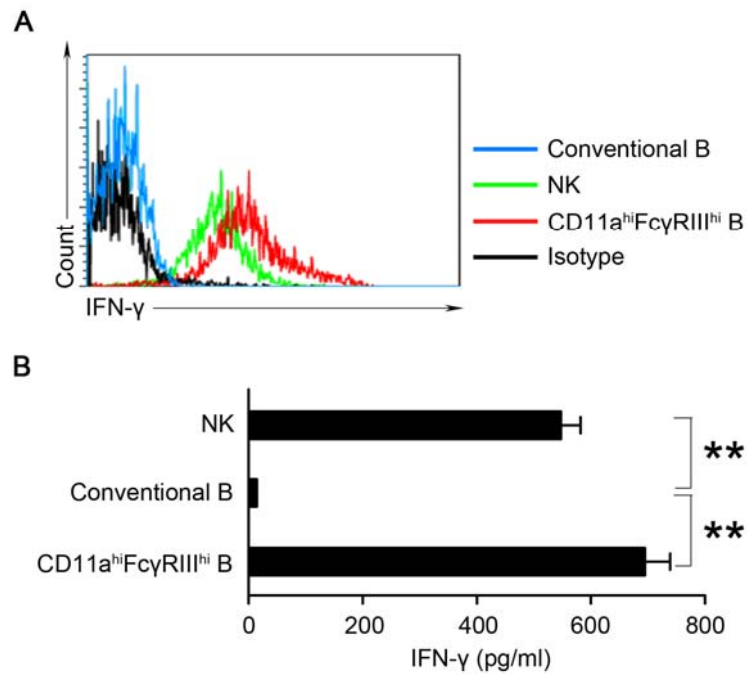

**Supplementary information, Figure S2** CD11a<sup>hi</sup>FcγRIII<sup>hi</sup> B cells produce considerable amount of IFN-γ in the early stage of LM infection apart from NK cells. C57BL/6 mice were i.p. infected with  $2 \times 10^6$  LM. (A) Intracellular expression of IFN-γ in CD11a<sup>hi</sup>FcγRIII<sup>hi</sup> B, conventional B cells and NK cells were assayed 3d post-infection. (B) Splenic CD11a<sup>hi</sup>FcγRIII<sup>hi</sup> B, conventional B cells and NK cells were sorted 3d post-infection, respectively. IFN-γ secretion was detected by ELISA. Data are mean  $\pm$  SD of triplicate experiments. \* $p < 0.05$ , \*\* $p < 0.01$ .
