# Supplementary material for: Identification of IFN-γ-producing innate B cells
Source: PubMed Central journal article supplement — Cell Res. 2013 Dec 3;24(2):161–76. doi: 10.1038/cr.2013.155 (PMC3915900; doi:10.1038/cr.2013.155), 2013-12-03
Supplement: cr2013155x3.pdf [file cr2013155x3.pdf]

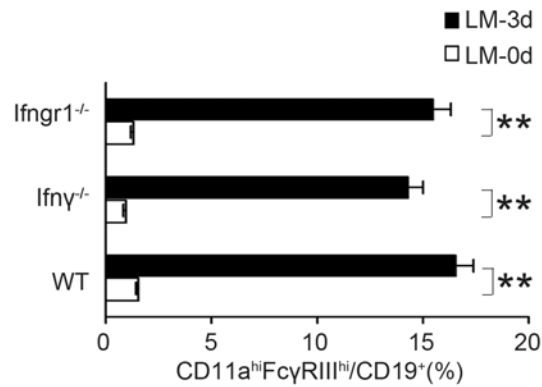

**Supplementary information, Figure S3** LM infection induces generation of CD11a<sup>hi</sup>FcγRIII<sup>hi</sup> B cells in both *Ifnγ*<sup>-/-</sup> mice and *Ifngr1*<sup>-/-</sup> mice. WT, *Ifnγ*<sup>-/-</sup> and *Ifngr1*<sup>-/-</sup> mice were i.p. infected with 2×10<sup>6</sup> LM. The CD11a<sup>hi</sup>FcγRIII<sup>hi</sup> cell population in splenic B cells was determined 3d after LM infection.
