# Supplementary material for: Identification of IFN-γ-producing innate B cells
Source: PubMed Central journal article supplement — Cell Res. 2013 Dec 3;24(2):161–76. doi: 10.1038/cr.2013.155 (PMC3915900; doi:10.1038/cr.2013.155), 2013-12-03
Supplement: cr2013155x4.pdf [file cr2013155x4.pdf]

| Pathway                                   | p-Value  |
|-------------------------------------------|----------|
| Cytokine-cytokine receptor interaction    | 1.17E-29 |
| Calcium signaling pathway                 | 3.93E-22 |
| Cell adhesion molecules (CAMs)            | 1.11E-20 |
| Primary immunodeficiency                  | 1.51E-20 |
| MAPK signaling pathway                    | 2.43E-20 |
| Allograft rejection                       | 2.47E-16 |
| Type I diabetes mellitus                  | 7.39E-16 |
| Asthma                                    | 3.26E-15 |
| B cell receptor signaling pathway         | 1.51E-14 |
| GnRH signaling pathway                    | 2.50E-11 |
| Antigen processing and presentation       | 3.62E-11 |
| Natural killer cell mediated cytotoxicity | 5.90E-11 |
| Graft-versus-host disease                 | 1.64E-10 |
| Systemic lupus erythematosus              | 3.26E-10 |
| Jak-STAT signaling pathway                | 5.90E-10 |
| Leukocyte transendothelial migration      | 4.06E-08 |

**Supplementary information, Table S1** KEGG pathway enrichment analysis of three sets of genes in CD11a<sup>hi</sup> FcγRIII<sup>hi</sup> B and conventional B cells. C57BL/6 mice were infected with LM. Splenic CD11a<sup>hi</sup>FcγRIII<sup>hi</sup> B and conventional B cells were sorted 3d post-infection, respectively. Immuno-pathways enrichment of higher expressed genes in both two B cell subsets was then analyzed.
